# Supplementary material
Source: publisher figshare collection journal article supplement (https://frontiersin.figshare.com/ndownloader/files/25862286)

Supplementary Figure S1

| A  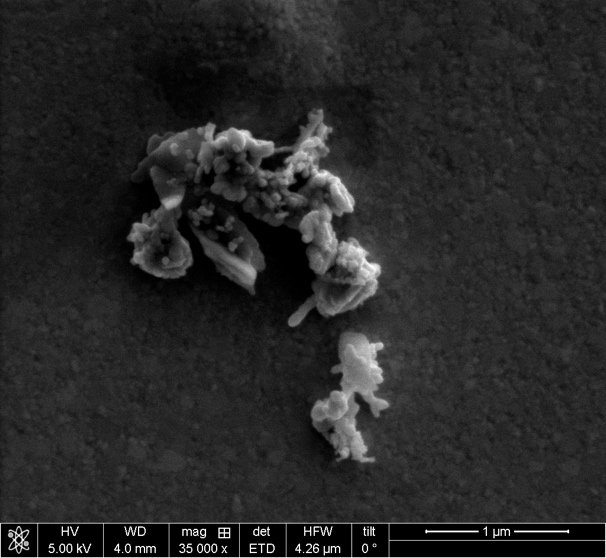 | B  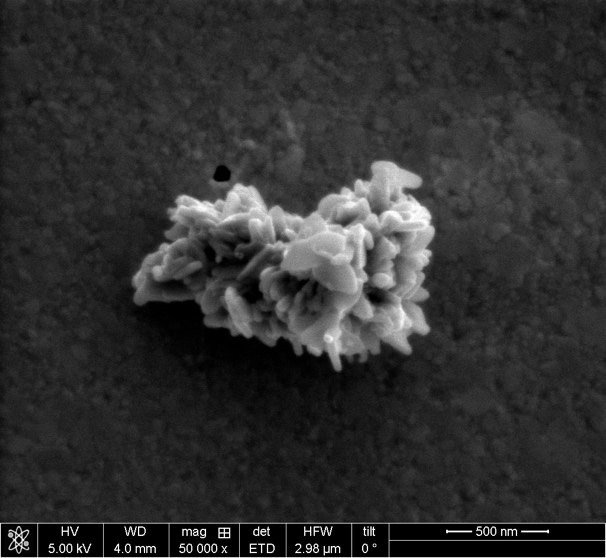 |
| --- | --- |
| C  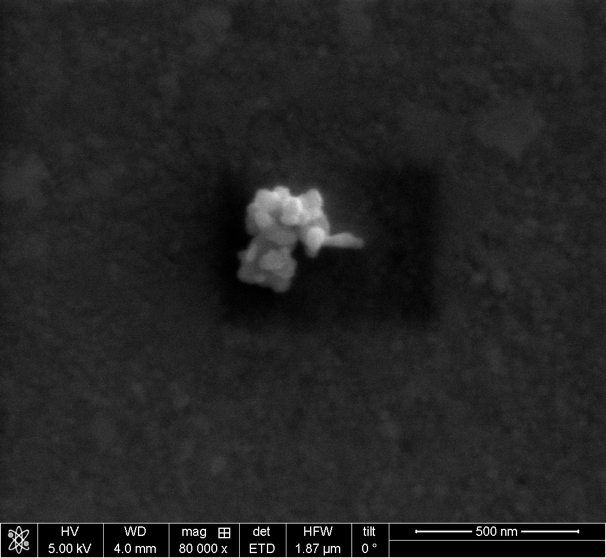 | D  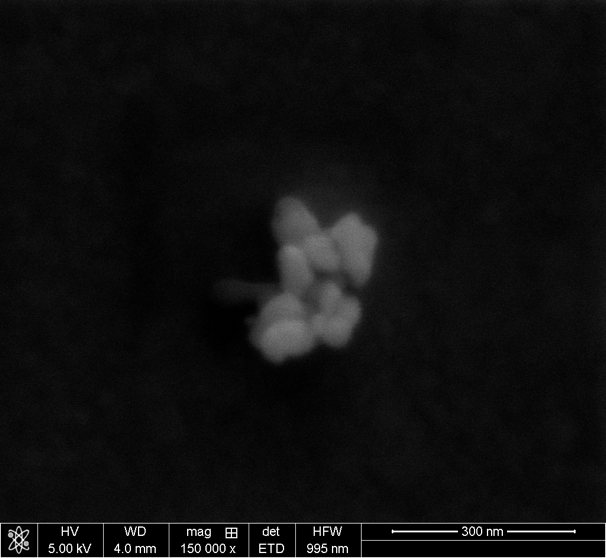 |
| E  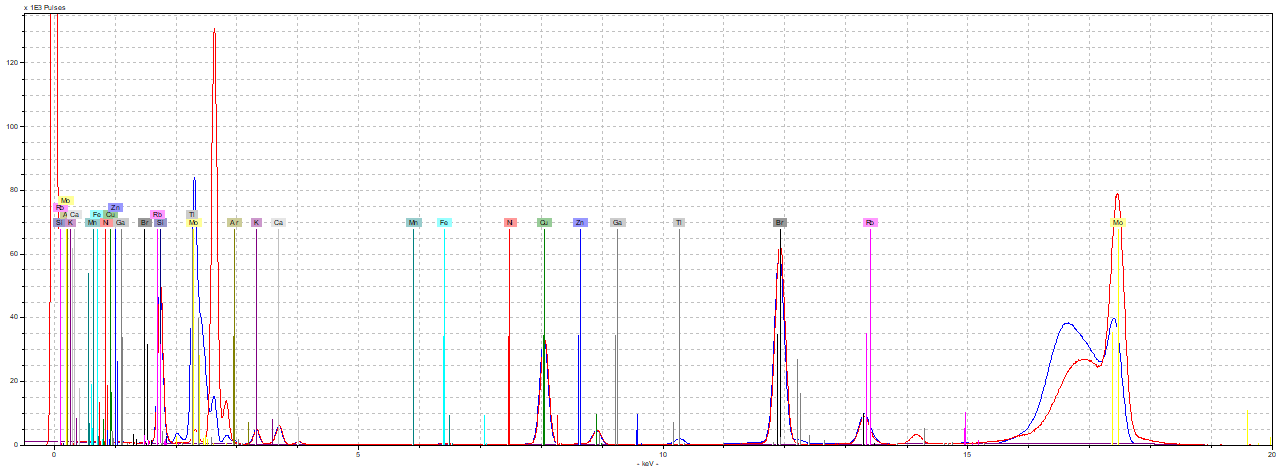 | |

Supplement: Supplementary file 1 [file 25862286]
